# Supplementary material
Source: publisher site journal article supplement (https://www.dovepress.com/article/454060)

**Supplementary Table 1.** Baseline characteristics of the study subjects.

| <b>Variables</b>                | <b>ALL(n=717)</b> | <b>Female<br/>(n=263)</b> | <b>Male (n=454)</b> | <b><i>P</i></b> |
|---------------------------------|-------------------|---------------------------|---------------------|-----------------|
| <b>Age</b>                      | 80.1 (2.93)       | 79.7 (2.91)               | 80.3 (2.92)         | 0.02            |
| <b>Smoking</b>                  |                   |                           |                     | <0.001          |
| No                              | 523 (72.94%)      | 258 (98.10%)              | 265 (58.37%)        |                 |
| Yes                             | 194 (27.06%)      | 5 (1.90%)                 | 189 (41.63%)        |                 |
| <b>Drinking</b>                 |                   |                           |                     | <0.001          |
| No                              | 629 (87.73%)      | 249 (94.68%)              | 380 (83.70%)        |                 |
| Yes                             | 88 (12.27%)       | 14 (5.32%)                | 74 (16.30%)         |                 |
| <b>ASCVD<br/>family history</b> |                   |                           |                     | 0.001           |
| No                              | 565 (78.80%)      | 189 (71.86%)              | 376 (82.82%)        |                 |
| Yes                             | 152 (21.20%)      | 74 (28.14%)               | 78 (17.18%)         |                 |
| <b>Diabetes</b>                 |                   |                           |                     | 1               |
| No                              | 545 (76.01%)      | 200 (76.05%)              | 345 (75.99%)        |                 |
| Yes                             | 172 (23.99%)      | 63 (23.95%)               | 109 (24.01%)        |                 |
| <b>Hypertension</b>             |                   |                           |                     | <0.001          |
| No                              | 335 (46.72%)      | 172 (65.40%)              | 163 (35.90%)        |                 |

|                                         |              |              |              |        |
|-----------------------------------------|--------------|--------------|--------------|--------|
| Yes                                     | 382 (53.28%) | 91 (34.60%)  | 291 (64.10%) |        |
| <b>Cardio-cerebral vascular disease</b> |              |              |              | <0.001 |
| No                                      | 500 (69.74%) | 245 (93.16%) | 255 (56.17%) |        |
| Yes                                     | 217 (30.26%) | 18 (6.84%)   | 199 (43.83%) |        |
| <b>Area</b>                             |              |              |              | 0.302  |
| South                                   | 713 (99.44%) | 263 (100%)   | 450 (99.12%) |        |
| North                                   | 4 (0.56%)    | 0 (0.00%)    | 4 (0.88%)    |        |
| <b>Urban/rural</b>                      |              |              |              | <0.001 |
| Rural                                   | 317 (44.21%) | 61 (23.19%)  | 256 (56.39%) |        |
| urban                                   | 400 (55.79%) | 202 (76.81%) | 198 (43.61%) |        |
| <b>Hart rate</b>                        | 79.6 (14.4)  | 79.8 (13.6)  | 79.4 (14.8)  | 0.73   |
| <b>Systolic blood pressure</b>          | 133 (17.6)   | 135 (19.2)   | 132 (16.6)   | 0.02   |
| <b>Diastolic blood pressure</b>         | 74.1 (10.7)  | 75.6 (10.4)  | 73.2 (10.8)  | 0.004  |
| <b>WC</b>                               | 83.4 (10.1)  | 80.3 (9.15)  | 85.2 (10.2)  | <0.001 |
| <b>Creatinine</b>                       | 80.4 (22.2)  | 80.2 (20.4)  | 80.5 (23.2)  | 0.891  |

|                                         |                  |                  |                  |        |
|-----------------------------------------|------------------|------------------|------------------|--------|
| <b>FBG</b>                              | 5.60 (1.45)      | 5.65 (1.50)      | 5.57 (1.43)      | 0.489  |
| <b>Glutamic-pyruvic transaminase</b>    | 39.1 [23.9;50.0] | 42.6 [27.3;52.1] | 37.5 [23.1;48.8] | 0.003  |
| <b>Glutamic oxalacetic transaminase</b> | 28.8 [22.1;36.6] | 30.2 [22.8;37.8] | 28.1 [21.8;36.3] | 0.063  |
| <b>TC</b>                               | 4.52 (1.08)      | 5.00 (1.01)      | 4.25 (1.02)      | <0.001 |
| <b>TG</b>                               | 1.03 [0.76;1.53] | 1.13 [0.78;1.53] | 1.01 [0.74;1.53] | 0.171  |
| <b>HDL-C</b>                            | 1.45 (0.36)      | 1.59 (0.33)      | 1.38 (0.36)      | <0.001 |
| <b>LDL-C</b>                            | 2.47 (0.78)      | 2.70 (0.80)      | 2.34 (0.74)      | <0.001 |
| <b>Framingham score</b>                 | 16.8 (2.48)      | 19.1 (2.11)      | 15.5 (1.51)      | <0.001 |
| <b>Framingham %</b>                     | 22.1 (7.80)      | 15.1 (7.17)      | 26.1 (4.66)      | <0.001 |
| <b>Framingham risk</b>                  |                  |                  |                  | <0.001 |
| Low risk                                | 71 (9.90%)       | 71 (27.00%)      | 0 (0.00%)        |        |
| Medium risk                             | 148 (20.64%)     | 125 (47.52%)     | 23 (5.07%)       |        |
| High risk                               | 498 (69.46%)     | 67 (25.48%)      | 431 (94.93%)     |        |

---

|                  |              |              |              |        |
|------------------|--------------|--------------|--------------|--------|
| <b>China-PAR</b> |              |              |              |        |
| <b>%</b>         | 12.4 (4.24)  | 11.4 (4.42)  | 13.0 (4.02)  | <0.001 |
| <b>China-PAR</b> |              |              |              | <0.001 |
| Medium risk      | 221 (30.82%) | 122 (46.39%) | 99 (21.81%)  |        |
| High risk        | 496 (69.18%) | 141 (53.61%) | 355 (78.19%) |        |
| <b>PCE%</b>      | 36.1 (14.0)  | 32.8 (15.3)  | 37.9 (12.8)  | <0.001 |
| <b>PCE</b>       |              |              |              | <0.001 |
| Medium risk      | 51 (7.11%)   | 44 (16.73%)  | 7 (1.54%)    |        |
| High risk        | 666 (92.89%) | 219 (83.27%) | 447 (98.46%) |        |
| <b>ASCVD</b>     |              |              |              | <0.001 |
| No               | 511 (71.27%) | 217 (82.51%) | 294 (64.76%) |        |
| Yes              | 206 (28.73%) | 46 (17.49%)  | 160 (35.24%) |        |

---

**Supplementary Figure 1.** Flow diagram depicting the inclusion process for the study subjects.

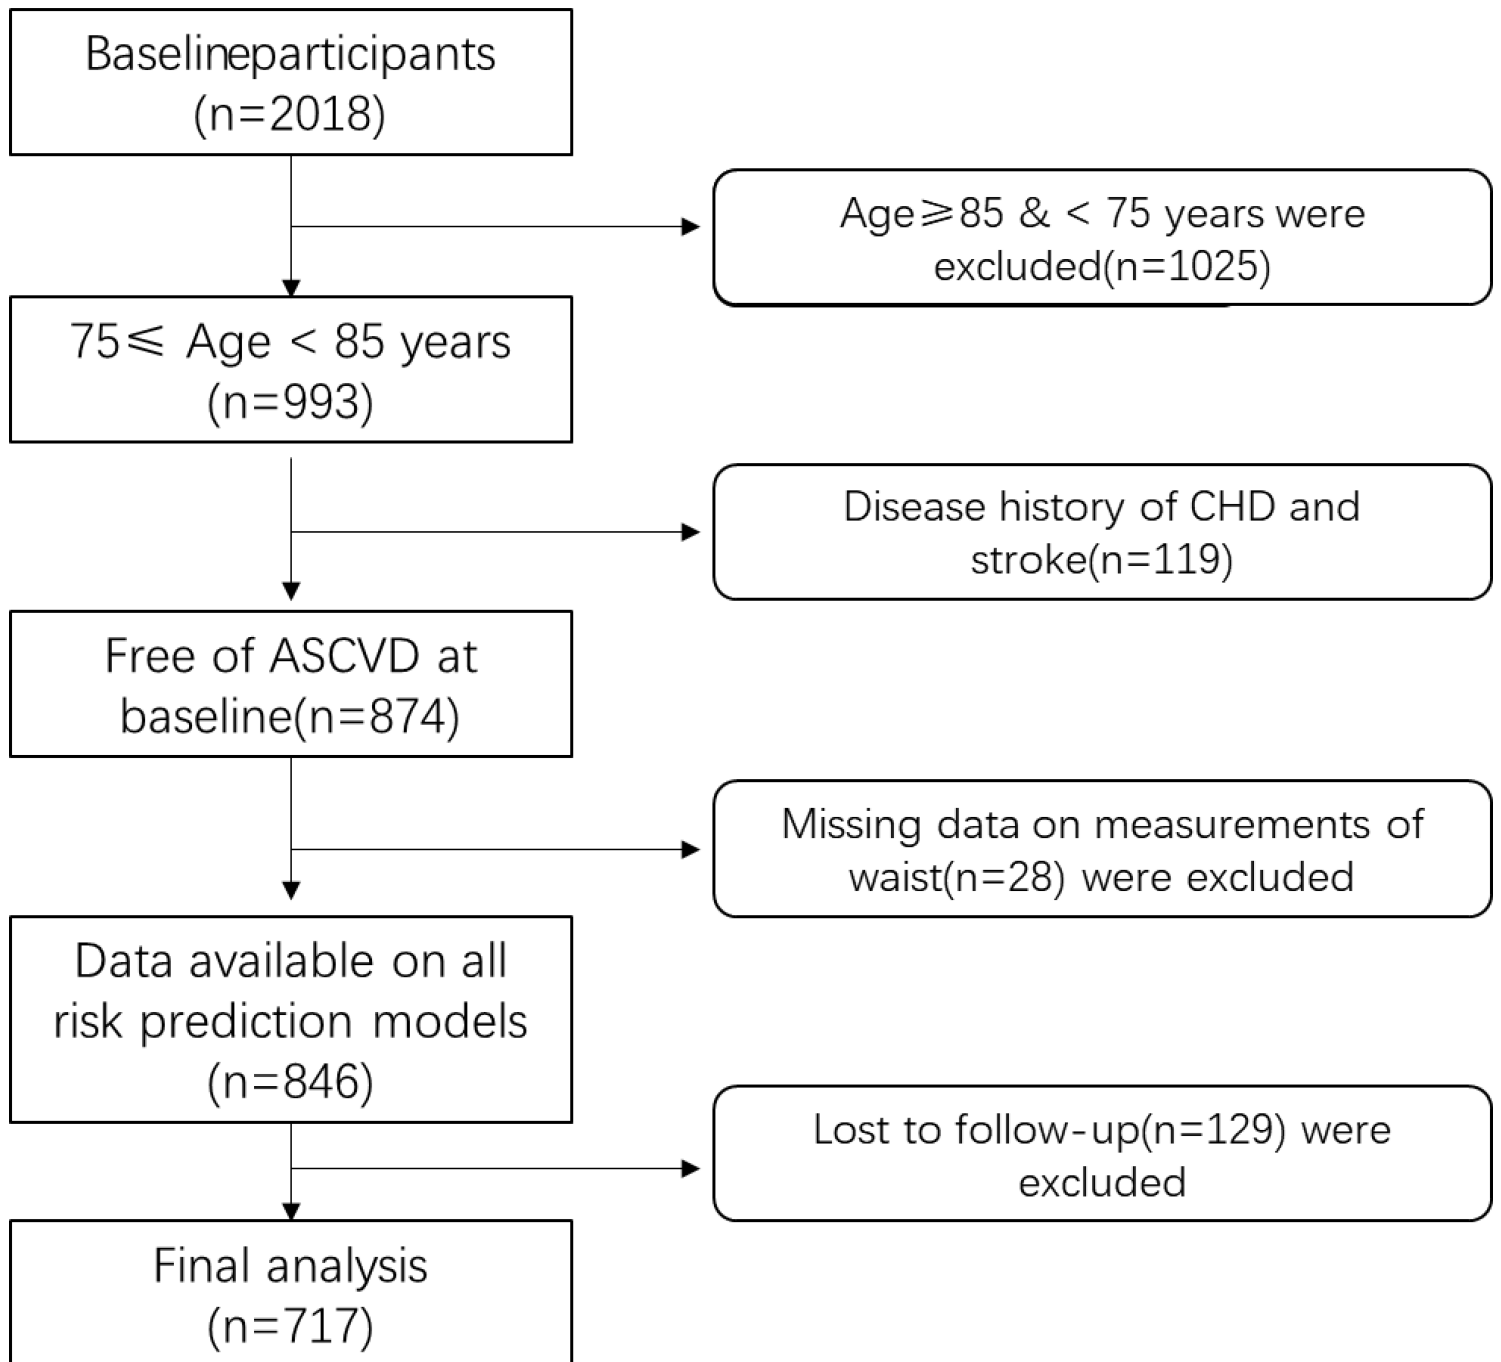

Supplement: Supplementary file 1 [file get_supplementary_file.php]
